# Supplementary material
Source: PubMed Central journal article supplement (PMC9012680)
Supplement: NIHMS1778885-supplement-2.pdf [file NIHMS1778885-supplement-2.pdf]

## Supplemental Figure 2

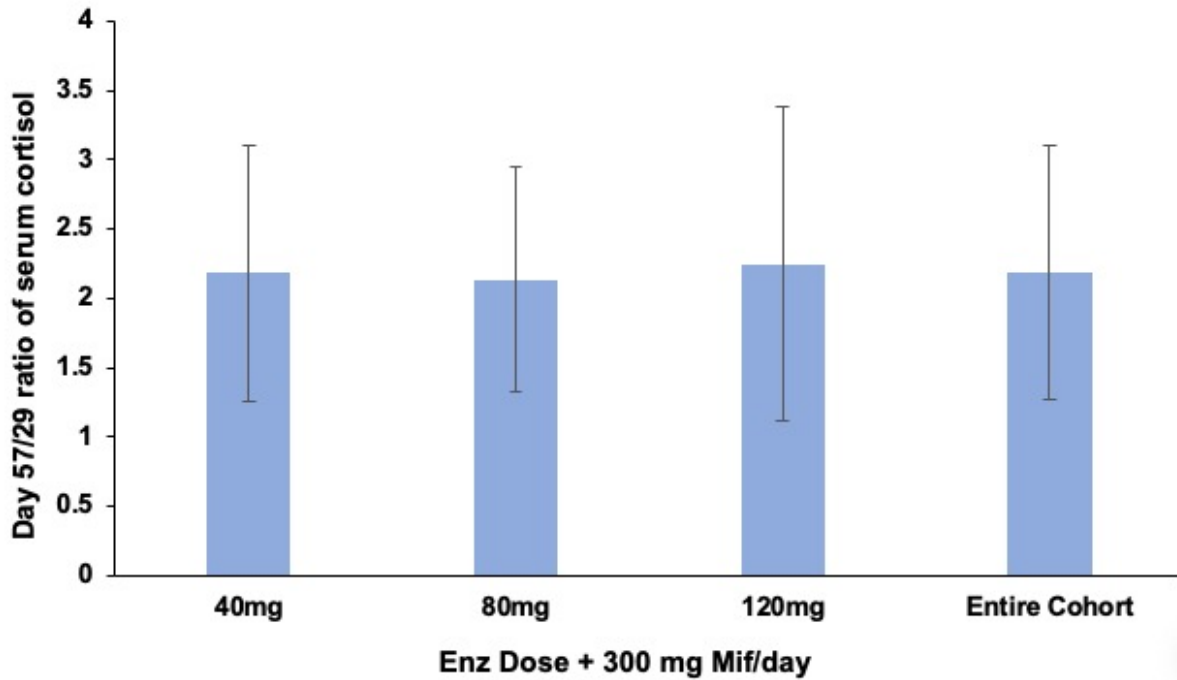

### Supplementary Figure 2. Serum cortisol during Phase 1

Cortisol routinely doubled as expected in all cohorts indicating adequate systemic GR antagonism at each Enz dose.

Abbreviations: Enz, enzalutamide; Mif, mifepristone.
